# Supplementary material
Source: publisher figshare collection journal article supplement (https://tandf.figshare.com/articles/dataset/_/22016100)
Supplement: Supplementary file 1 [file 1]

**Table S1.** Comparison of the characteristics of the non-DNS and DNS groups.

|  | **Non-DNS group** | **DNS group** | ***p*-value** |
| --- | --- | --- | --- |
| **(N = 101)** | **(N = 27)** |
| Age, years | 42.9 ± 14.4 | 45.9 ± 16.0 | 0.370 |
| Sex, n (%) |  |  | 0.647* |
| Female | 32 (31.7) | 10 (37.0) |  |
| Male | 69 (68.3) | 17 (63.0) |  |
| Vital signs |  |  |  |
| Systolic blood pressure, mmHg | 130 [115–140] | 130 [115–145] | 0.577 |
| Diastolic blood pressure, mmHg | 80 [70–90] | 80 [70–98] | 0.644 |
| Heart rate, /min | 91.6 ± 18.1 | 91.0 ± 18.4 | 0.877 |
| Respiratory rate, /min | 20 [19–20] | 20 [18–20] | 0.141 |
| Comorbidities, n (%) |  |  |  |
| Diabetes | 7 (6.9) | 1 (3.7) | >0.99** |
| Hypertension | 7 (6.9) | 5 (18.5) | 0.128** |
| Current smoker, n (%) | 55 (59.8) | 14 (53.9) | 0.655* |
| GCS score at presentation | 15 [13–15] | 13 [10–15] | 0.005** |
| GCS < 15, n (%) | 30 (29.7) | 15 (55.6) | 0.023* |
| Symptoms, n (%) |  |  |  |
| Headache | 10 (9.9) | 2 (7.4) | >0.99** |
| Loss of consciousness | 31 (30.7) | 9 (33.3) | 0.818* |
| Dizziness | 13 (12.9) | 2 (7.4) | 0.736** |
| Dyspnea | 7 (6.9) | 1 (3.7) | >0.99** |
| Chest pain | 1 (1.0) | 1 (3.7) | 0.379** |
| Laboratory findings |  |  |  |
| White blood cell count, 103/**µL** | 14.7 [8.6–15.3] | 11.8 [9.1–15.8] | 0.772 |
| Hemoglobin, g/dL | 14.9 [13.7–16] | 14.4 [12.8–15.9] | 0.326 |
| Protein, g/dL | 7.2 ± 0.6 | 7.3 ± 0.6 | 0.759 |
| Albumin, g/dL | 4.4 ± 0.4 | 4.3 ± 0.4 | 0.550 |
| Glucose, mg/dL | 112 [101–131] | 126 [104–150] | 0.383 |
| BUN, mg/dL | 12.7 [10.9–17.5] | 14.4 [11.1–21.4] | 0.203 |
| Creatinine, mg/dL | 1 [0.9–1.2] | 1 [0.9–1.2] | 0.859 |
| Creatine Kinase, U/L | 122 [83–263.3] | 230 [85.5–1626.5] | 0.142 |
| Troponin I, ng/mL | 0.1 [0.1–0.2] | 0.1 [0.1–0.5] | 0.546 |
| C-reactive protein, mg/L | 0.1 [0.0–0.3] | 0.3 [0.1–0.8] | 0.008 |
| Lactate, mg/dL | 2.1 [1.7–4.8] | 1.9 [1.1–3.7] | 0.255 |
| COHb, % | 11.3 [5.7–17.7] | 5.2 [2.2–10.7] | 0.004 |
| Duration of CO exposure, min | 120 [50–240] | 300 [180–490] | 0.004 |
| Type of exposure, n (%) |  |  | 0.190* |
| Unintentional | 25 (24.8) | 3 (11.1) |  |
| Intentional | 76 (75.3) | 24 (88.9) |  |
| HBOT, n (%) | 81 (80.2) | 25 (92.6) | 0.160** |
| Steroid use, n (%) | 83 (82.2) | 16 (59.3) | 0.019* |
| Note: Values are presented as means ± standard deviations, medians [interquartile ranges], or numbers (proportions). *Pearson’s χ2 test, ** Fisher’s exact test. Abbreviations: GCS, Glasgow Coma Scale; BUN, blood urea nitrogen; COHb, carboxyhemoglobin; CO, carbon monoxide; HBOT, hyperbaric oxygen therapy; DNS, delayed neuropsychiatric sequelae. | | | |
|  | | | |
